# Supplementary material for: Help seeking behavior and onset-to-alarm time in patients with acute stroke: sub-study of the preventive antibiotics in stroke study
Source: PubMed Central journal article supplement (PMC5123223; doi:10.1186/s12883-016-0749-2), 2016-11-25
Supplement: 12883_2016_749_MOESM2_ESM.pdf [file 12883_2016_749_MOESM2_ESM.pdf]

| <b>Supplement I. Recognition# N = 157*</b>                                | <b>N</b>  |
|---------------------------------------------------------------------------|-----------|
| <b>Speech</b>                                                             |           |
| Not being able to speak                                                   | 13        |
| Difficult, or worsened speaking                                           | 24        |
| Strange speaking                                                          | 2         |
| Blurred speaking                                                          | 14        |
| Speaking nonsense or inconsistent                                         | 2         |
| Trouble with finding right words                                          | 3         |
| Babbling                                                                  | 1         |
| Speaking as if drunk                                                      | 1         |
| Speaking with double tongue                                               | 2         |
| Soft speaking                                                             | 1         |
| Changed speaking                                                          | 1         |
| Lisping                                                                   | 1         |
|                                                                           | <b>65</b> |
| <b>Function</b>                                                           |           |
| Weakness, paralysis, not being able to move, weak or heavy limb (1 sided) | 49        |
| Weakness legs, dropping down (2 sided)                                    | 2         |
| Not being able to stand                                                   | 4         |
| Not being able to stand up                                                | 5         |
| Not being able to stand on leg, dropping through leg, or knee             | 5         |
| Not being able to walk                                                    | 2         |
| Impaired walking                                                          | 2         |
| Walking as if drunk                                                       | 1         |
| Strange walking                                                           | 1         |
| Unstable walking                                                          | 2         |
| Fuzzy walking                                                             | 1         |
| Brains uncontrolled                                                       | 1         |
|                                                                           | <b>75</b> |
| Dragging foot or leg                                                      | 5         |
| Foot as if stuck on floor                                                 | 1         |
| Leg less controlled                                                       | 1         |
| Unstable leg                                                              | 1         |
| Strange leg                                                               | 1         |
| Trembling feet                                                            | 1         |
|                                                                           | <b>10</b> |
| Dragging to the left side, hanging over to one side                       | 2         |
| Risk to fall                                                              | 2         |
| Falling                                                                   | 4         |
| Loosing balance                                                           | 1         |
| Gliding out of bed                                                        | 1         |
|                                                                           | <b>10</b> |
| Impaired function of the hand, not being able to grab something           | 8         |
| Not being able to use arm                                                 | 1         |
| Something wrong with the hand                                             | 1         |
| Dropping something, dropping something out of the hand                    | 2         |
| Trembling arm                                                             | 1         |
| Less control over the arm, clumsy hand                                    | 2         |
| Impaired fine motorics                                                    | 1         |
|                                                                           | <b>16</b> |
| Not being able to open the door with key                                  | 1         |
| Impaired typing                                                           | 1         |
| Not being able to drive the car                                           | 1         |

|                                                           |           |
|-----------------------------------------------------------|-----------|
| Not being able to turn around in bed                      | 1         |
| Not being able to hold the rollator                       | 1         |
|                                                           | <b>5</b>  |
| <b>Face</b>                                               |           |
| Face asymmetry                                            | 15        |
| Not being able to drink water, fluid running out of mouth | 2         |
| Stiff feeling round mouth                                 | 2         |
| Hanging lip                                               | 1         |
|                                                           | <b>20</b> |
| <b>Vision</b>                                             |           |
| Diplopia                                                  | 6         |
| Not being able/ impaired vision                           | 3         |
| Impaired field of vision                                  | 3         |
| Not being able to read with one eye                       | 1         |
| Misty vision                                              | 3         |
|                                                           | <b>16</b> |
| <b>Sensation</b>                                          |           |
| No, impaired, or dead feeling                             | 19        |
| Tingling                                                  | 9         |
| Sleepy arm                                                | 1         |
|                                                           | <b>29</b> |
| <b>Dizziness</b>                                          | 16        |
| Dizziness with turning sensation                          | 3         |
|                                                           | <b>19</b> |
| <b>Pain</b>                                               |           |
| Headache                                                  | 8         |
| High pressure in head, splashing feeling in head          | 1         |
| Pain in arms, or legs                                     | 2         |
|                                                           | <b>11</b> |
| <b>Malaise</b>                                            |           |
| Feeling unwell                                            | 4         |
| Transpiring                                               | 1         |
| Feeling strange in head                                   | 2         |
| Feeling strange                                           | 1         |
| Feeling as if drunk                                       | 2         |
| Feeling snotty                                            | 1         |
| Feeling miserable                                         | 1         |
| Feeling shaky                                             | 1         |
| Nauseous                                                  | 9         |
| Vomiting                                                  | 7         |
|                                                           | <b>29</b> |
| <b>Consciousness</b>                                      |           |
| Non responsive, or loosing consciousness                  | 2         |
| Not reacting                                              | 1         |
| Being off-track                                           | 2         |
| Impaired notion                                           | 1         |
| Impaired orientation                                      | 1         |
| Changed behaviour                                         | 1         |
| Confused                                                  | 1         |
|                                                           | <b>9</b>  |

|                                      |          |
|--------------------------------------|----------|
| <b>Other</b>                         |          |
| Not being able to do a thing         | 1        |
| Troubled arm                         | 1        |
| Strange movements with arms, or legs | 1        |
| Complaints left side of the body     | 1        |
| Body acting strangely                | 1        |
| Tinnitus                             | 1        |
| Impaired hearing                     | 1        |
| Problem of the heart                 | 1        |
| Due to physical therapy              | 1        |
|                                      | <b>9</b> |
| <b>Nothing</b>                       | <b>1</b> |

# More answers per patient were possible

\* Missing values: PID 58: neglect? PID 5, 120, 136: no answer given
