# Supplementary material for: Help seeking behavior and onset-to-alarm time in patients with acute stroke: sub-study of the preventive antibiotics in stroke study
Source: PubMed Central journal article supplement (PMC5123223; doi:10.1186/s12883-016-0749-2), 2016-11-25

## Supplement II. Process of help seeking behaviour

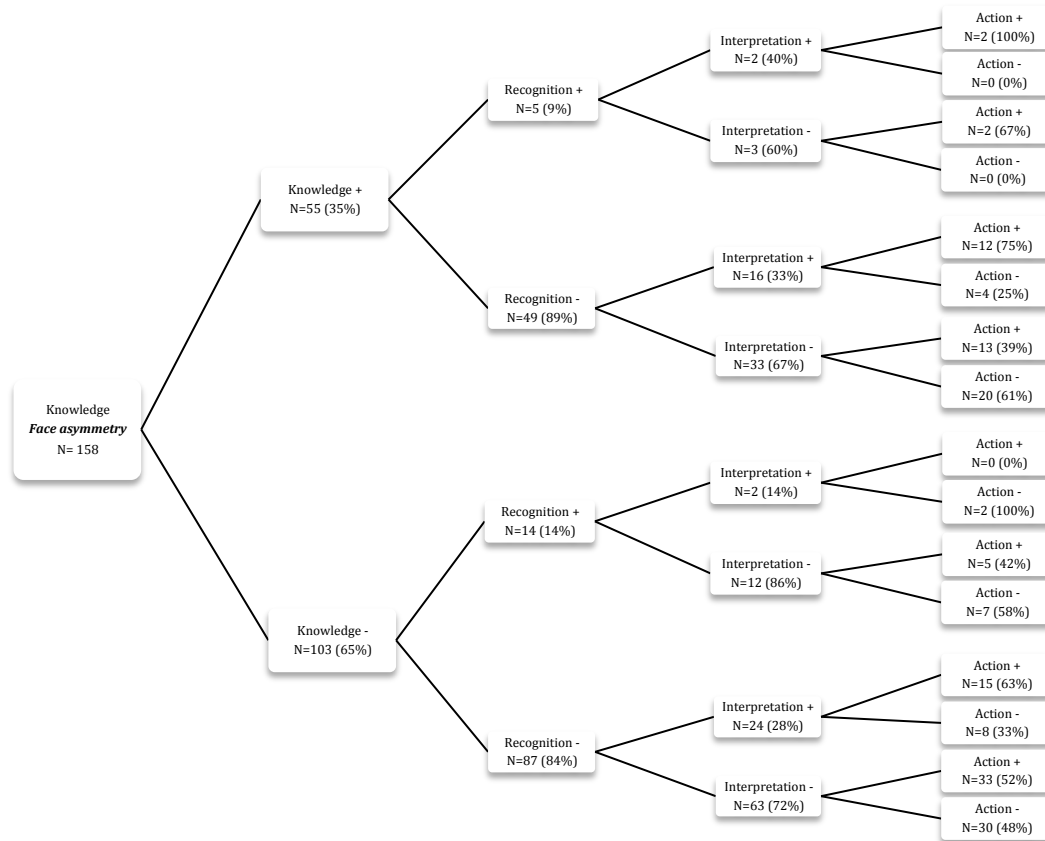

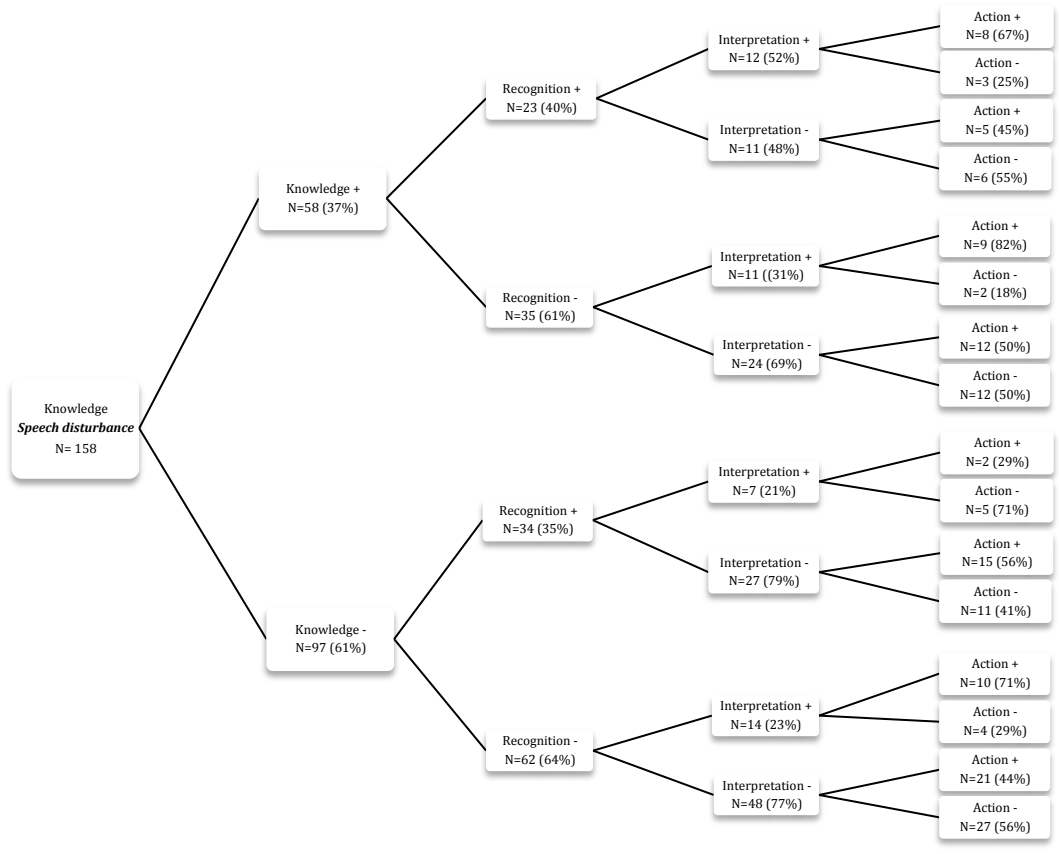

Supplement: 12883_2016_749_MOESM3_ESM.pdf [file 12883_2016_749_MOESM3_ESM.pdf]
